# Supplementary material for: Thermometer: a webserver to predict protein thermal stability
Source: Oxford University Press journal article supplement (doi:10.1093/bioinformatics/btab868), 2022-01-08
Supplement: btab868_supplementary_data.pdf [file btab868_supplementary_data.pdf]

# Supplementary Information:

## Thermometer: a webserver to predict protein thermal stability

Mattia Miotto,<sup>1</sup> Alexandros Armaos,<sup>2</sup> Lorenzo Di Rienzo,<sup>1</sup> Giancarlo Ruocco,<sup>1,3</sup> Edoardo Milanetti,<sup>3,1</sup> and Gian Gaetano Tartaglia<sup>2,1</sup>

<sup>1</sup>Center for Life Nano & Neuroscience, Istituto Italiano di Tecnologia, Viale Regina Elena 291, 00161, Rome, Italy

<sup>2</sup>Department of Biology, Sapienza University, Piazzale Aldo Moro 5, 00185, Rome, Italy

<sup>3</sup>Department of Physics, Sapienza University, Piazzale Aldo Moro 5, 00185, Rome, Italy

### I. DATASET

#### A. Datasets

Proteins with known melting temperature ( $T_m$ ) were obtained from the ProTherm database [1]. We selected all wild-type proteins for which the following thermodynamic data and experimental conditions were reported:  $T_m \geq 0^\circ\text{C}$ ;  $6.5 \leq \text{pH} \leq 7.5$  and no denaturants. Experimentally determined structures were collected from the PDB (Berman et al. 2) and filtered according to method (x-ray diffraction), resolution (below  $3\text{\AA}$ ) and percentage of missing residues (5% compared to the Uniprot (Pundir et al. 3) sequence). Proteins for which experimentally determined structures were only available in a bound state, i.e. in complex with either a ligand or a ion, were excluded. Proteins were filtered using the CD-HIT software (Huang et al. 4) to remove proteins with chain sequence identity  $\geq 40\%$  to each other. The final dataset, hereinafter referred to as the  $T_m$  dataset, consisted of 86 proteins. Consistently with previous reported dataset, thermostable proteins ( $T_m \geq 70^\circ\text{C}$ ) represent about a third of the overall dataset (Karshikoff and Ladenstein 5, Parthasarathy and Murthy 6, Kannan and Vishveshwara 7). In order to have a dataset as balanced as possible, we also manually collected a second, independent dataset consisting of proteins from hyperthermophilic organisms with optimal growth at  $T \geq 90^\circ\text{C}$  and pH between 6.5 and 7.5. Experimentally determined structures were collected and filtered according to same criteria described above for the  $T_m$  dataset, leading to a total of 13 protein structures. This second dataset is referred to as the  $T_{hyper}$  dataset. The union of the two dataset, referred as the  $T_{whole}$  dataset, accounts of 99 proteins

#### B. Clustering analysis

We clustered the  $T_s$  descriptors using the Euclidean distance and the Ward method as linkage function (Ward 8) via the `hclust` function of the Stats package of R (Ihaka and Gentleman 9). To better compare the different  $T_s$  score between them we normalize the data dividing each  $T_s$  score for the maximum of the absolute values. Finally, using the R package "clValid" (Brock et al. 10), we performed an internal validation for the hierarchical cluster considering both the Connectivity, Dunn and Silhouette parameters.

- 
- [1] R. Nikam, A. Kulandaisamy, K. Harini, D. Sharma, and M. M. Gromiha, *Nucleic Acids Res* **49**, D420 (2021).
  - [2] H. M. Berman, J. Westbrook, Z. Feng, G. Gilliland, T. N. Bhat, H. Weissig, I. N. Shindyalov, and P. E. Bourne, *Nucleic Acids Res.* **28**, 235 (2000).
  - [3] S. Pundir, M. J. Martin, and C. O'Donovan, *Methods Mol. Biol.* **1558**, 41 (2017).
  - [4] Y. Huang, B. Niu, Y. Gao, L. Fu, and W. Li, *Bioinformatics* **26**, 680 (2010).
  - [5] A. Karshikoff and R. Ladenstein, *Protein Eng.* **11**, 867 (1998).
  - [6] S. Parthasarathy and M. R. Murthy, *Protein Eng.* **13**, 9 (2000).
  - [7] N. Kannan and S. Vishveshwara, *Protein Eng.* **13**, 753 (2000).
  - [8] J. H. Ward, *Journal of the American Statistical Association* **58**, 236 (1963).
  - [9] R. Ihaka and R. Gentleman, *Journal of Computational and Graphical Statistics* **5**, 299 (1996).
  - [10] G. Brock, V. Pihur, S. Datta, and S. Datta, *Journal of Statistical Software* **25** (2008).
  - [11] U. Ermler, M. Merckel, R. Thauer, and S. Shima, *Structure* **5**, 635 (1997).
  - [12] H. Tanaka, M. Chinami, T. Mizushima, K. Ogasahara, M. Ota, T. Tsukihara, and K. Yutani, *J. Biochem.* **130**, 107 (2001).
  - [13] C. Charron, X. Manival, B. Charpentier, C. Branlant, and A. Aubry, *Acta Crystallogr. D Biol. Crystallogr.* **60**, 122 (2004).
  - [14] R. Kawakami, H. Sakuraba, S. Goda, H. Tsuge, and T. Ohshima, *Biochim. Biophys. Acta* **1794**, 1496 (2009).
  - [15] S. Yoshinari, T. Shiba, D. K. Inaoka, T. Itoh, G. Kurisu, S. Harada, K. Kita, and Y. Watanabe, *Nucleic Acids Res.* **37**, 4787 (2009).
  - [16] M. Blaise, M. Frechin, V. Olieric, C. Charron, C. Sauter, B. Lorber, H. Roy, and D. Kern, *J. Mol. Biol.* **412**, 437 (2011).
  - [17] H. M. Park, M. Shin, J. Sun, G. S. Kim, Y. C. Lee, J. H. Park, B. Y. Kim, and J. S. Kim, *Proteins* **80**, 1895 (2012).
  - [18] C. Wang, Q. Jia, R. Chen, Y. Wei, J. Li, J. Ma, and W. Xie, *Sci Rep* p. 33553 (2016).

|    | PDB  | $T_m$ [ $^{\circ}$ C] | Type |
|----|------|-----------------------|------|
| 1  | 1a3y | 69.1                  | M    |
| 2  | 1ako | 42.6                  | M    |
| 3  | 1b8e | 78.0                  | T    |
| 4  | 1bd8 | 51.9                  | M    |
| 5  | 1bk7 | 64.4                  | M    |
| 6  | 1bni | 54.0                  | M    |
| 7  | 1bpi | 104.0                 | T    |
| 8  | 1btl | 56.4                  | M    |
| 9  | 1c5g | 67.5                  | M    |
| 10 | 1c9o | 76.9                  | T    |
| 11 | 1cec | 70.4                  | T    |
| 12 | 1chk | 52.2                  | M    |
| 13 | 1cm2 | 63.4                  | M    |
| 14 | 1cm7 | 34.0                  | M    |
| 15 | 1cmb | 54.0                  | M    |
| 16 | 1csp | 52.8                  | M    |
| 17 | 1czd | 52.3                  | M    |
| 18 | 1div | 77.6                  | T    |
| 19 | 1ekg | 58.2                  | M    |
| 20 | 1ew4 | 53.8                  | M    |
| 21 | 1fsf | 66.9                  | M    |
| 22 | 1fvk | 76.8                  | T    |
| 23 | 1gtm | 114.4                 | T    |
| 24 | 1gwy | 67.0                  | M    |
| 25 | 1h7m | 93.5                  | T    |
| 26 | 1h09 | 51.4                  | M    |
| 27 | 1hix | 66.7                  | M    |
| 28 | 1hk0 | 80.0                  | T    |
| 29 | 1i4n | 90.3                  | T    |
| 30 | 1ino | 58.0                  | M    |
| 31 | 1j2v | 148.5                 | T    |
| 32 | 1j4s | 66.0                  | M    |
| 33 | 1jji | 99.0                  | T    |
| 34 | 1jyd | 68.9                  | M    |
| 35 | 1ke4 | 54.6                  | M    |
| 36 | 1lnw | 55.6                  | M    |
| 37 | 1mjc | 59.0                  | M    |
| 38 | 1msi | 46.6                  | M    |
| 39 | 1npk | 62.0                  | M    |
| 40 | 1onc | 88.5                  | T    |
| 41 | 1orc | 57.0                  | M    |
| 42 | 1pii | 51.0                  | M    |
| 43 | 1poh | 63.4                  | M    |
| 44 | 1qhe | 56.0                  | M    |
| 45 | 1r56 | 68.9                  | M    |
| 46 | 1rg8 | 39.8                  | M    |
| 47 | 1rgg | 49.0                  | M    |
| 48 | 1rhg | 60.9                  | M    |
| 49 | 1rn1 | 48.9                  | M    |
| 50 | 1rop | 68.7                  | M    |
| 51 | 1rtb | 61.3                  | M    |
| 52 | 1sfp | 78.6                  | T    |
| 53 | 1spp | 60.1                  | M    |
| 54 | 1stn | 52.7                  | M    |
| 55 | 1tca | 57.7                  | M    |
| 56 | 1tpe | 51.4                  | M    |
| 57 | 1udv | 157.5                 | T    |
| 58 | 1v6h | 112.7                 | T    |
| 59 | 1y4y | 88.3                  | T    |
| 60 | 1ypr | 67.9                  | M    |
| 61 | 1zdr | 66.2                  | M    |
| 62 | 2cro | 56.0                  | M    |
| 63 | 2dri | 57.5                  | M    |
| 64 | 2gd1 | 78.5                  | T    |
| 65 | 2izp | 83.7                  | T    |
| 66 | 2lzm | 62.2                  | M    |
| 67 | 2prd | 86.0                  | T    |
| 68 | 2sil | 57.0                  | M    |
| 69 | 2y3z | 87.0                  | T    |
| 70 | 2zta | 77.9                  | T    |
| 71 | 3chy | 57.8                  | M    |
| 72 | 3d2a | 63.4                  | M    |
| 73 | 3dfq | 61.2                  | M    |
| 74 | 3enj | 47.8                  | M    |
| 75 | 3ssi | 82.2                  | T    |
| 76 | 4ake | 51.8                  | M    |
| 77 | 4blm | 67.0                  | M    |
| 78 | 4g03 | 66.4                  | M    |
| 79 | 4gcr | 70.4                  | T    |
| 80 | 4lyz | 80.0                  | T    |
| 81 | 4n9h | 66.4                  | M    |
| 82 | 5fb6 | 68.7                  | M    |
| 83 | 5pep | 52.0                  | M    |
| 84 | 2x9b | 67.2                  | M    |
| 85 | 3kvd | 84.1                  | T    |
| 86 | 3n4y | 100.2                 | T    |

TABLE I: Table of the 86 proteins of the  $T_m$  dataset, collected from ProTherm database.

[19] W. G. Touw, C. Baakman, J. Black, T. A. te Beek, E. Krieger, R. P. Joosten, and G. Vriend, *Nucleic Acids Res.* **43**, D364 (2015).

| Name                                          | Organism               | PDB  | Ref.            |
|-----------------------------------------------|------------------------|------|-----------------|
| Formylmethanofuran                            | Methanopyrus kandleri  | 1ftr | [11]            |
| pyrrolidone carboxyl peptidase                | Pyrococcus furiosus    | 1iof | [12]            |
| L7Ae sRNP core protein                        | Pyrococcus abyssi      | 1pxw | [13]            |
| malate dehydrogenase                          | Aeropyrum pernix       | 2d4a | [14]            |
| D-Tyr-tRNA(Tyr) deacylase                     | Aquifex aeolicus       | 2dbo | To Be Published |
| hypothetical protein (Aq-1549)                | Aquifex aeolicus       | 2e8f | To Be Published |
| 3-oxoacyl-[acyl-carrier-protein] synthase III | Aquifex aeolicus       | 2ebd | To Be Published |
| aq-1716                                       | Aquifex aeolicus       | 2p68 | To Be Published |
| 3-dehydroquinate dehydratase                  | Aquifex aeolicus       | 2ysw | To Be Published |
| splicing endonuclease                         | Pyrobaculum aerophilum | 2zyz | [15]            |
| archaeal asparagine synthetase A              | Pyrococcus abyssi      | 3p8t | [16]            |
| Cas6                                          | Pyrococcus furiosus    | 3ufc | [17]            |
| tRNA methyltransferase Trm5a                  | Pyrococcus abyssi      | 5hjj | [18]            |

TABLE II: Table of Hyperthermophiles proteins manually collected on the PDB bank [19].
